# Supplementary material
Source: MDPI journal article supplement (https://www.mdpi.com/2072-4292/15/2/337)
Supplement: s1 [file s1]

## **Supplementary Materials**

### **Ecological drought condition index to monitor vegetation response to meteorological drought in Korean Peninsula**

Jeongeun Won<sup>a</sup>, Sangdan Kim<sup>a,\*</sup>

<sup>a</sup>Division of Earth Environmental System Science (Major in Environmental Engineering), Pukyong National University, 45 Yongso-ro, Nam-gu, Busan, 48513, Republic of Korea

\* Correspondence: skim@pknu.ac.kr

4 pages, 4 figures

## Figures

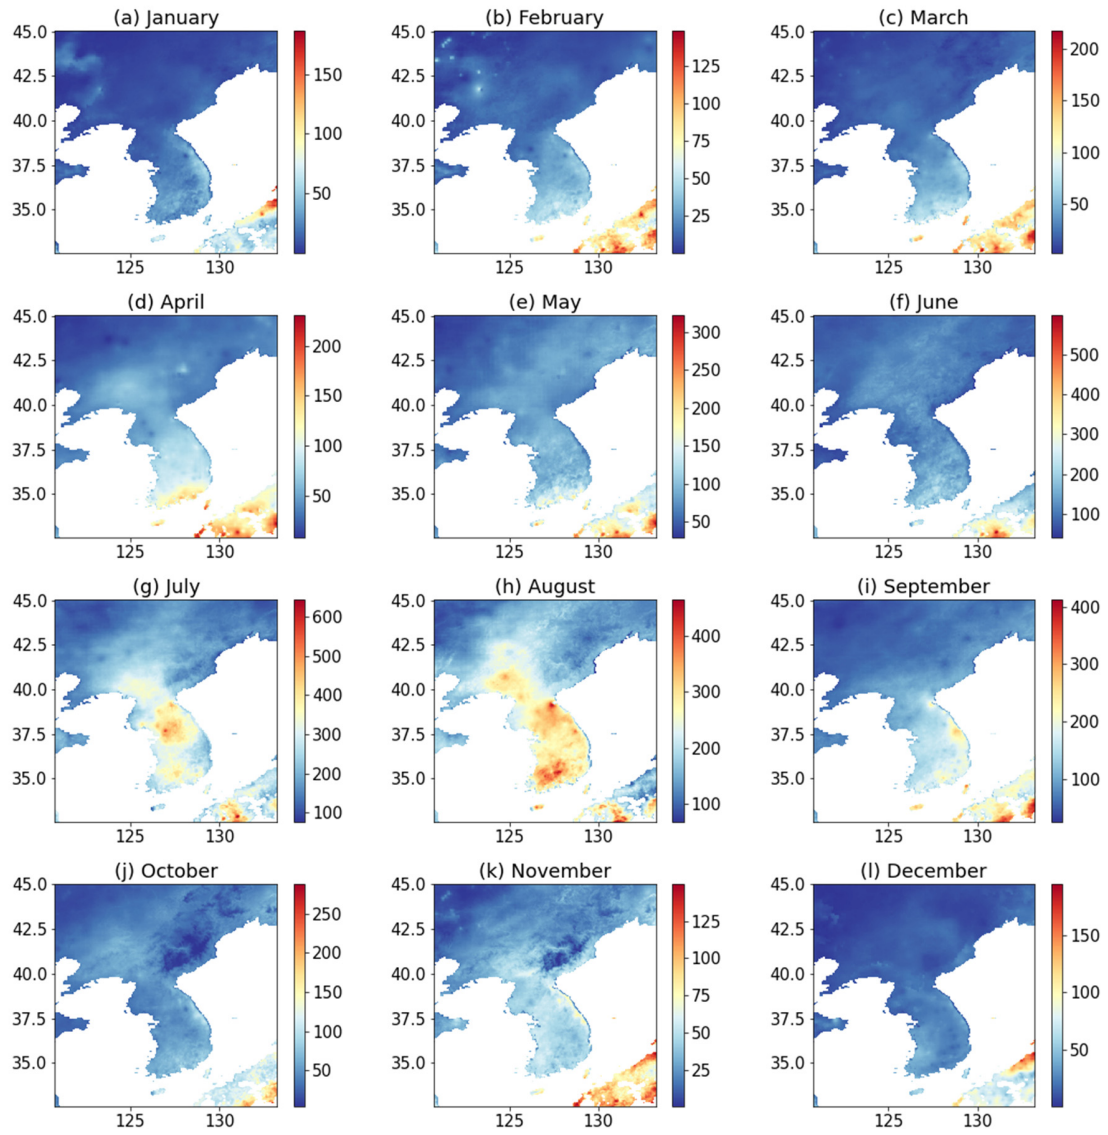

**Figure S1.** Spatial distribution of average monthly precipitation based on CHIRPS from 2000 to 2021 in the study area.

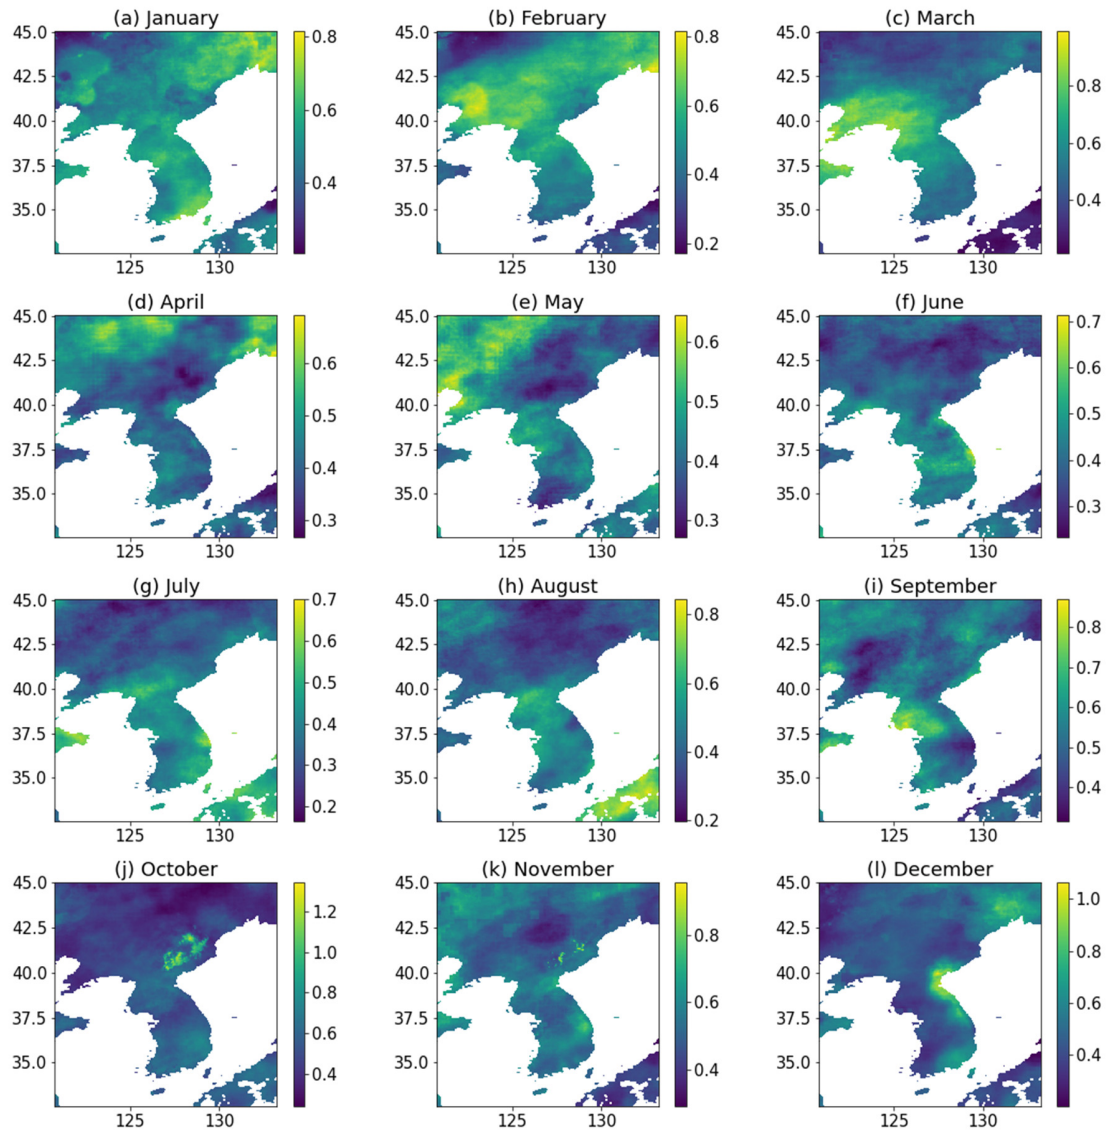

**Figure S2.** Spatial distribution of monthly precipitation coefficients of variation based on CHIRPS from 2000 to 2021 in the study area.

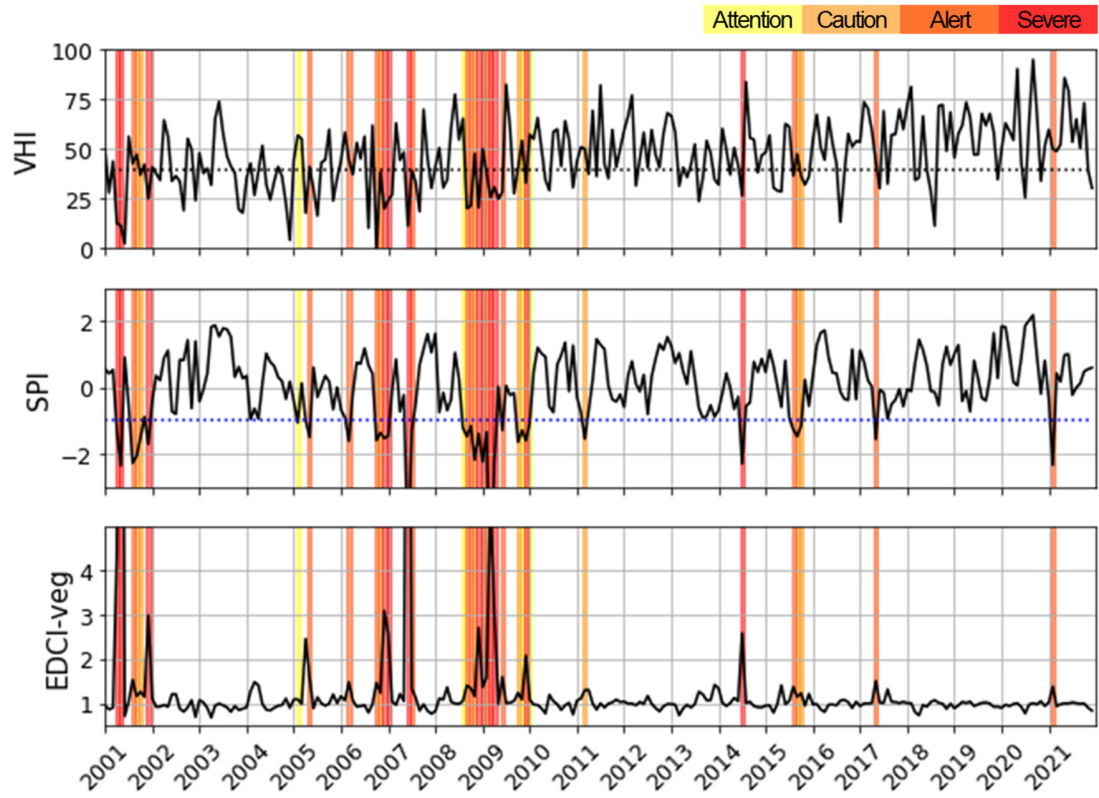

**Figure S3.** Time series of ecological drought monitoring by applying the ecological drought stage classification.

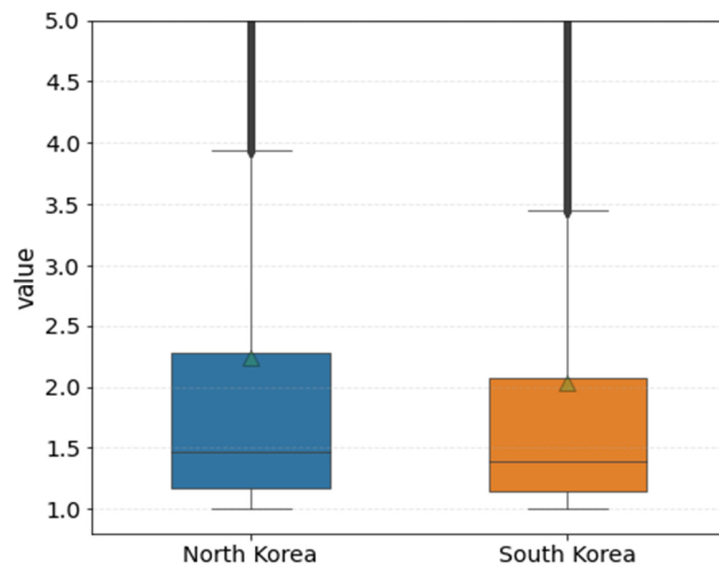

**Figure S4.** Comparison of ranges of EDCI-veg values in agricultural regions of North and South Korea.
